# Supplementary material for: The effect of anthropogenic drivers on spatial patterns of mangrove land use on the Amazon coast
Source: PLoS One. 2019 Jun 26;14(6):e0217754. doi: 10.1371/journal.pone.0217754 (PMC6594664; doi:10.1371/journal.pone.0217754)
Supplement: S2 Table — (XLSX) [file pone.0217754.s002.xlsx]

## Sheet: Plan1
S2 Table. Dataset of mangrove land use and anthropogenic drivers in the different microregions of the Brazilian Amazon coast.
Microregions	Area	Occurrence of land use	%	Population	%	Settlements	%	Number of urban center	%	Unpaved Road	%	Paved Road	%		Total Road		%
				2015		(km2)				(km)		(km)			(km)
Belém	1824	74	4	2233035	43	196	42.1	59	24	288	2	169		8	457	2
Castanhal	1257	33	2	102904	2	18	3.9	6	2	485	3	104		5	589	3
Salgado	5589	466	28	259665	5	53	11.4	14	6	2413	14	237		12	2650	14
Bragantina	6722	137	8	357289	7	24	5.2	41	16	3223	18	311		15	3534	18
Guamá	5017	11	1	62012	1	1	0.2	6	2	1317	8	26		1	1343	7
Gurupi	8188	65	4	128229	2	2	0.4	10	4	1461	8	136		7	1597	8
Litoral Ocidental Maranhense	9312	343	21	194772	4	7	1.5	16	6	3154	18	300		15	3454	18
São Luís	1189	351	21	1484458	29	131	28.1	45	18	463	3	212		10	675	4
Rosário	5013	73	4	161317	3	10	2.1	20	8	1481	8	177		9	1658	8
Lencóis Maranhenses	4542	95	6	62741	1	7	1.5	2	1	952	5	91		4	1043	5
Baixada ocidental Maranhense	8917			139850	3	17	3.6	30	12	2259	13	261		13	2520	13
Total	57570	1648		5186272		466		249		17496		2024			19520
